# Supplementary material for: Dimethoxy triarylamine-derived terpyridine–zinc complex: a fluorescence light-up sensor for citrate detection based on aggregation-induced emission
Source: Royal Society of Chemistry journal article supplement (doi:10.1039/c6tc03042d), 2016-01-01

## ***Electronic Supplementary Information (ESI)***

### **Dimethoxy triarylamine-derived terpyridine-zinc complex: a fluorescence light-up sensor for citrate detection based on the aggregation-induced emission**

Tao Jiang, Niannian Lu, Yandi Hang, Ji Yang, Ju Mei,\* Jian Wang, Jianli Hua\* and He Tian  
*Key Laboratory for Advanced Materials, Institute of Fine Chemicals, School of chemistry and Molecular  
Engineering, East China University of Science and Technology, 200237, Shanghai, China.*

#### **Contents list:**

|                                        |     |
|----------------------------------------|-----|
| <b>S1. Fig. S1</b> .....               | S-1 |
| <b>S2. Fig. S2</b> .....               | S-1 |
| <b>S3. Fig. S3</b> .....               | S-2 |
| <b>S4. Fig. S4</b> .....               | S-2 |
| <b>S5. Fig. S5</b> .....               | S-3 |
| <b>S6. Fig. S6</b> .....               | S-3 |
| <b>S7. Fig. S7</b> .....               | S-4 |
| <b>S8. Characterization Data</b> ..... | S-4 |

**S1. Fig. S1**

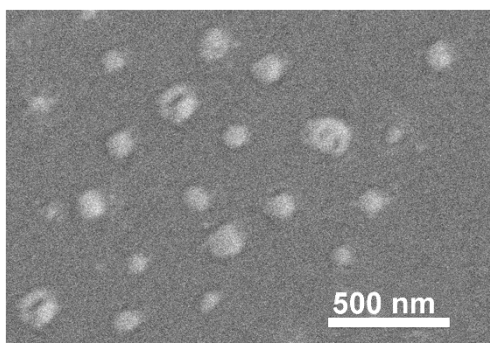

**Fig. S1** Scanning electronic microscope (SEM) image of **DTPA-TPY** in the THF/H<sub>2</sub>O mixture ( $f_w$  = 90 vol%, containing 1 vol% DMSO).

**S2. Fig. S2**

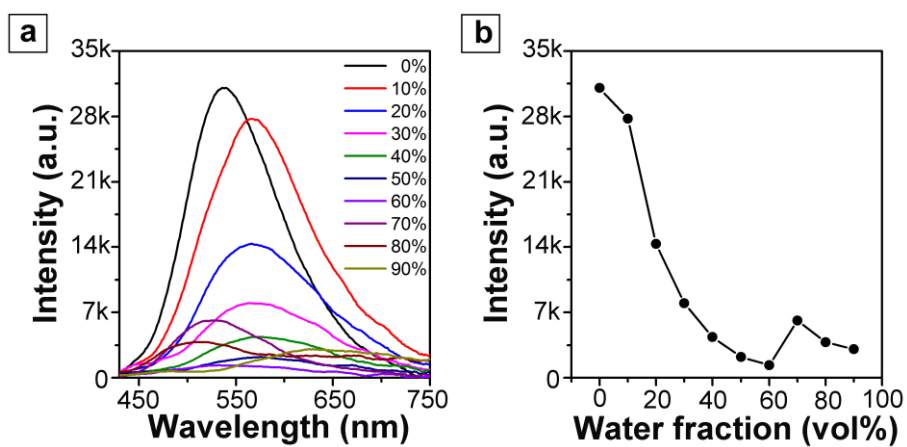

**Fig. S2** (a) Emission spectra of **DTPA-TPY-Zn** in the THF/H<sub>2</sub>O mixtures with different water fractions (containing 1 vol% DMSO). (b) Plot of maximum emission intensity of **DTPA-TPY-Zn** versus water fraction in the aqueous mixture. Dye concentration: 100  $\mu$ M. Excitation wavelength: 410 nm.

S3. Fig. S3

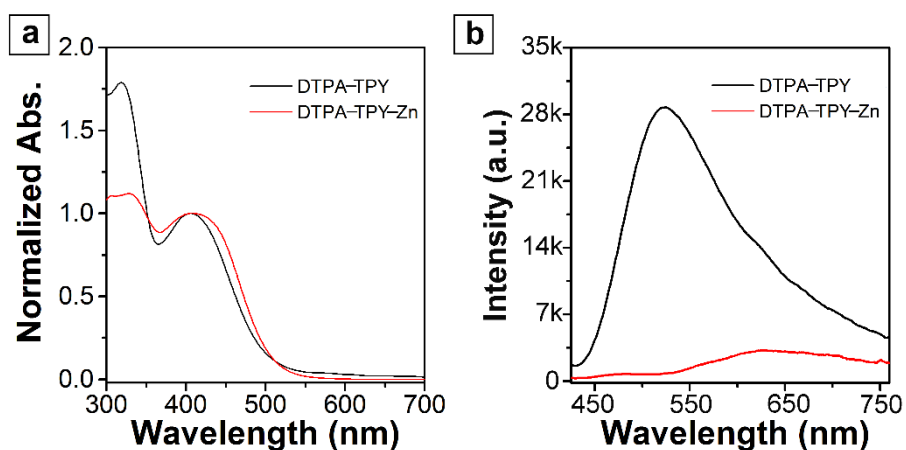

**Fig. S3** (a) Normalized absorption spectra of **DTPA-TPY** and **DTPA-TPY-Zn** in the THF/H<sub>2</sub>O mixtures ( $f_w = 65$  vol%, containing 1 vol% DMSO). (b) Fluorescence spectra of **DTPA-TPY** and **DTPA-TPY-Zn** in the THF/H<sub>2</sub>O mixtures ( $f_w = 90$  vol%, containing 1 vol% DMSO). Dye concentration: 100  $\mu$ M. Excitation wavelength: 410 nm.

S4. Fig. S4

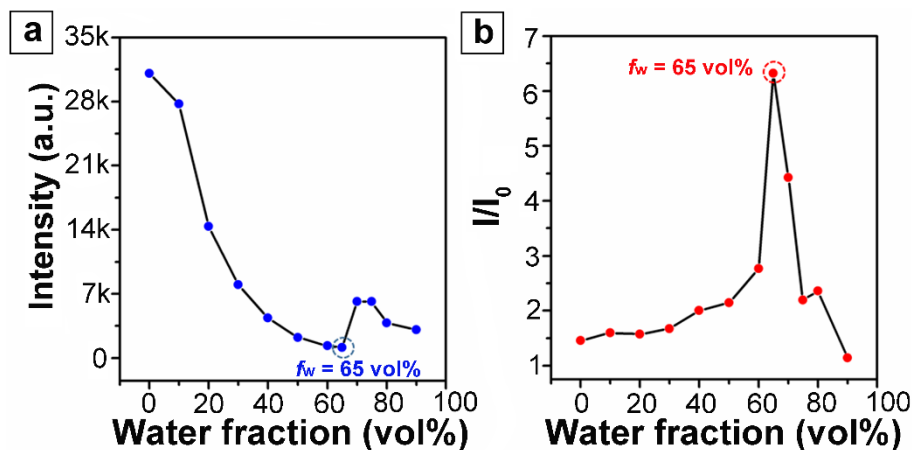

**Fig. S4** (a) Fluorescence spectra of **DTPA-TPY-Zn** (100  $\mu$ M) at the different THF/H<sub>2</sub>O mixtures (containing 1 vol% DMSO) in the absence of citrate. (b) Fluorescence spectra of **DTPA-TPY-Zn** (100  $\mu$ M) at the different THF/H<sub>2</sub>O mixtures (containing 1 vol% DMSO) in the presence of citrate (100  $\mu$ M).  $I/I_0$  represents the ratio between the fluorescence intensity of detection system with (I) and without ( $I_0$ ) citrate.

S5. Fig. S5

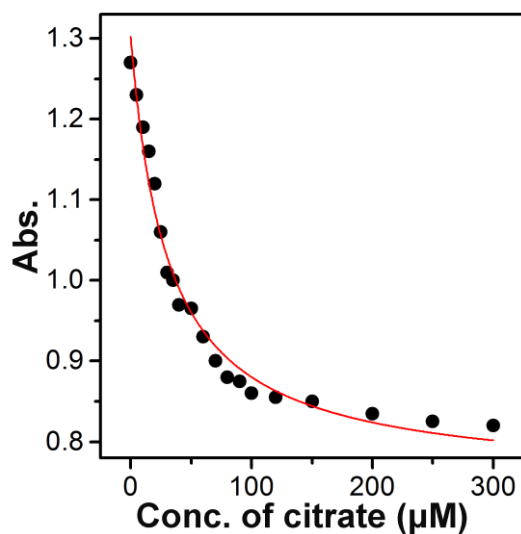

**Fig. S5** Binding constant curve for **DTPA-TPY-Zn** (100 µM) with citrate in the THF/H<sub>2</sub>O mixtures ( $f_w = 65$  vol%, containing 1 vol% DMSO). [Working formula:  $y = (A_0 + A \cdot K \cdot x) / (1 + K \cdot x)$ .  $x =$  [analyte],  $y =$  absorbance.  $\lambda_{\text{abs}} = 418$  nm.

S6. Fig. S6

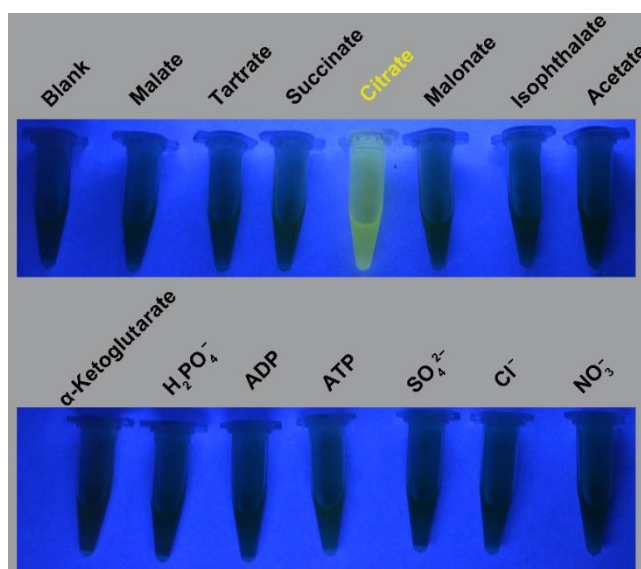

**Fig. S6** Photographs of **DTPA-TPY-Zn** in the absence and presence of citrate (100 µM) in the THF/H<sub>2</sub>O mixtures solution ( $f_w = 65$  vol%, containing 1 vol% DMSO, pH = 7) under 365 nm UV irradiation.

S7. Fig. S7

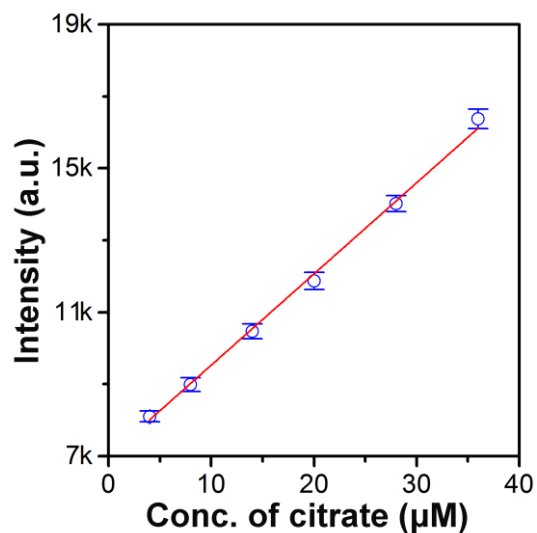

**Fig. S7** Plotting the fluorescence intensity (value of the emission maxima at 525 nm) as a function of low citrate concentration (4–36  $\mu\text{M}$ ) for **DTPA-TPY-Zn** (100  $\mu\text{M}$ ) in the THF/H<sub>2</sub>O mixtures ( $f_w$  = 65 vol%, containing 1 vol% DMSO).

## S8. Characterization Data

### <sup>1</sup>H NMR of compound 3

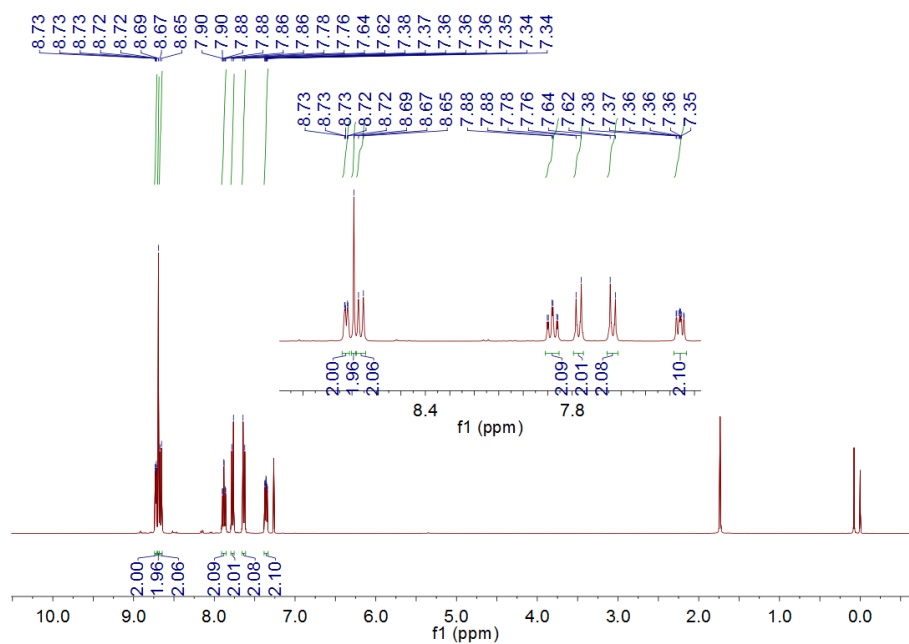

### <sup>1</sup>H NMR of compound DTPA-TPY

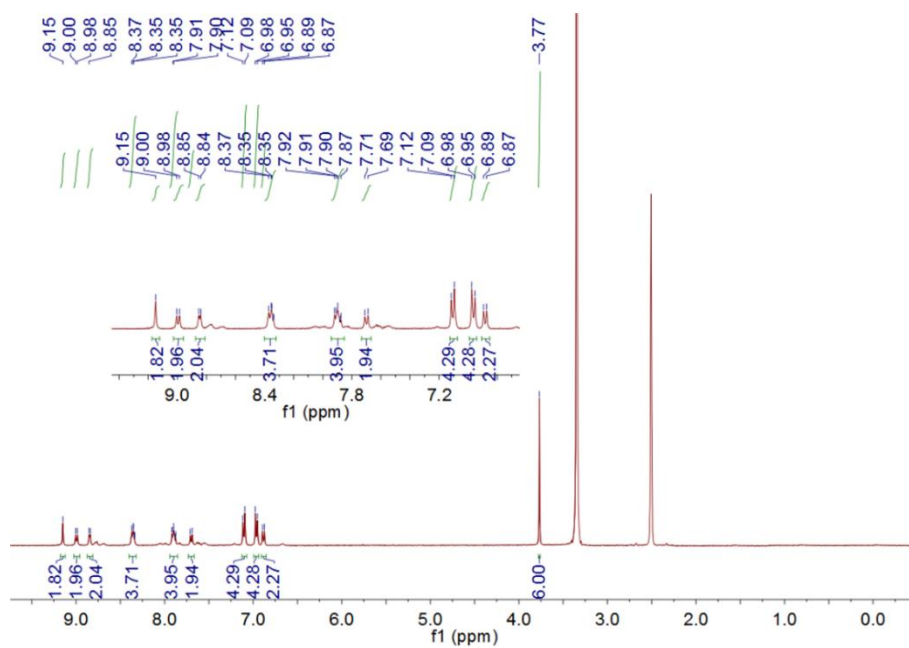

### <sup>13</sup>C NMR of compound DTPA-TPY

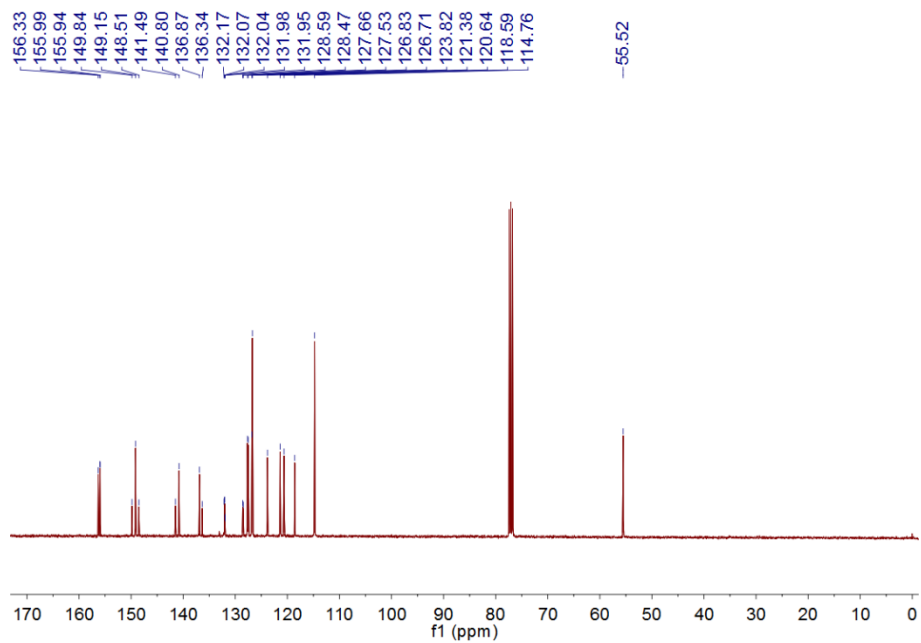

# High-Res ESI-TOF mass spectrum of DTPA-TPY

## Elemental Composition Report

Page 1

### Single Mass Analysis

Tolerance = 50.0 PPM / DBE: min = -1.5, max = 100.0

Element prediction: Off

Number of isotope peaks used for i-FIT = 2

Monoisotopic Mass, Even Electron Ions

4 formula(e) evaluated with 1 results within limits (up to 1 closest results for each mass)

Elements Used:

C: 0-41 H: 0-33 N: 0-4 O: 0-2

JL-HUA

ECUST institute of Fine Chem

30-Dec-2015

20:51:46

1: TOF MS ES+

4.74e+003

HL-JT-12.65 (0.497) Cm (63:67)

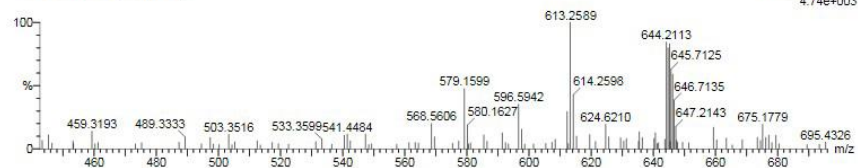

Minimum: 300.0 50.0 -1.5  
Maximum: 613.2589 100.0 100.0

| Mass     | Calc. Mass | mDa  | PPM  | DBE  | i-FIT | i-FIT (Norm) | Formula       |
|----------|------------|------|------|------|-------|--------------|---------------|
| 613.2589 | 613.2598   | -2.5 | -4.1 | 27.5 | 11.2  | 0.0          | C41 H33 N4 O2 |

## <sup>1</sup>H NMR of compound DTPA-TPY-Zn

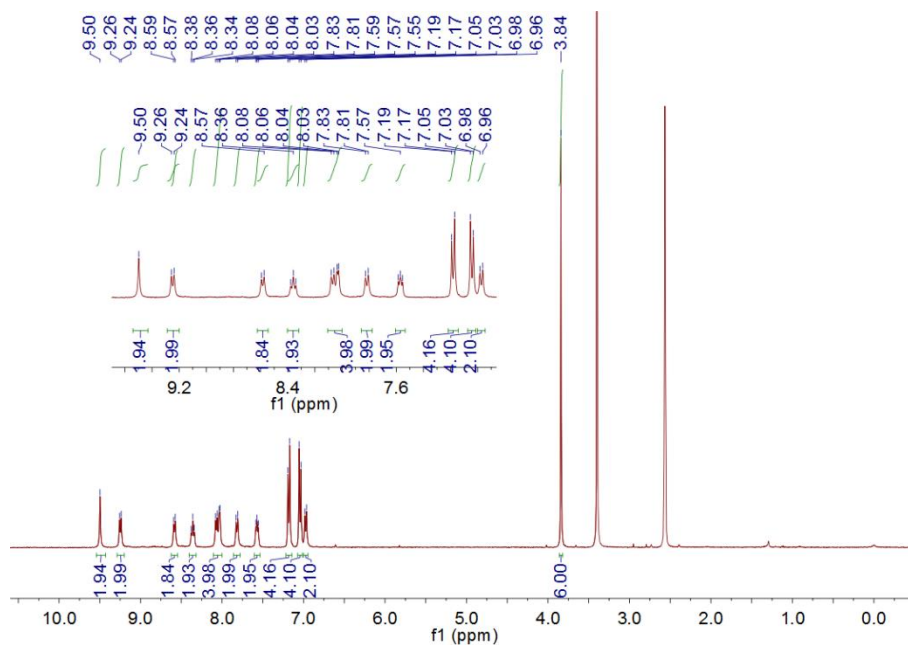

### $^{13}\text{C}$ NMR of compound DTPA-TPY-Zn

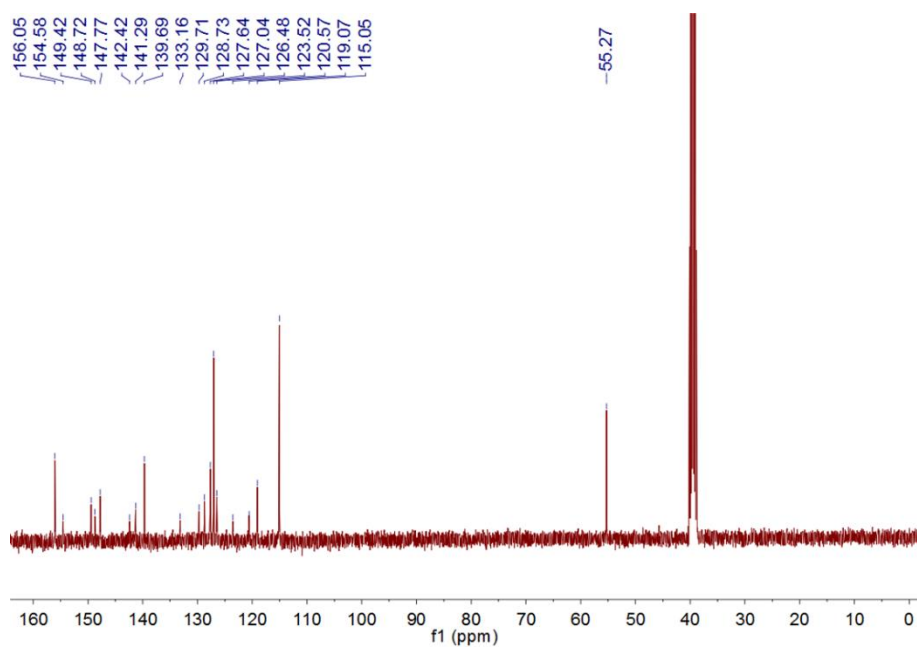

### MALDI-TOF mass spectrum of DTPA-TPY-Zn

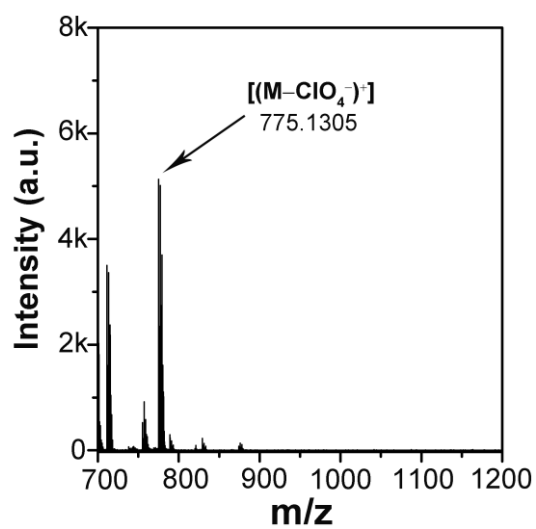

Supplement: c6tc03042d1.pdf [file c6tc03042d1.pdf]
